# Supplementary material for: Template switching and duplications in SARS-CoV-2 genomes give rise to insertion variants that merit monitoring
Source: PubMed Central journal article supplement (PMC8632935; doi:10.1038/s42003-021-02858-9), 2021-11-30
Supplement: 42003_2021_2858_MOESM2_ESM.pdf [file 42003_2021_2858_MOESM2_ESM.pdf]

## Description of Additional Supplementary Files

**File name:** Supplementary Data 1

**Description:** The list of inserts in SARS-CoV-2 genomes and genomes where they were found. Abbreviations in LoFreq Info column: DP – Raw Depth, AF – Allele Frequency, SB – Phred-scaled strand bias at this position, DP4 – Counts for ref-forward bases, ref-reverse, alt-forward and alt-reverse bases, HRUN – Homopolymer length to the right of report indel position.

**File name:** Supplementary Data 2

**Description:** The summary of supporting data for 354 inserts observed in this study. The details on the monophyly test are provided in Materials and Methods.

**File name:** Supplementary Data 3

**Description:** SRA records information for genomes found on the same clade as sequences containing ins22204:ATAGATCGA and ins22205:CGGCAGGCT.

**File name:** Supplementary Data 4

**Description:** The list of high confidence inserts with the potential mechanisms of their appearance. For template switch candidate the location of origin, sequence in origin and p-value are specified.

**File name:** Supplementary Data 5

**Description:** The acknowledgments to all Originating and Submitting laboratories that provided the data to GISAID utilized in this paper.
